# Supplementary material
Source: PubMed Central journal article supplement (PMC404324)
Supplement: 7600204s1.pdf [file 7600204s1.pdf]

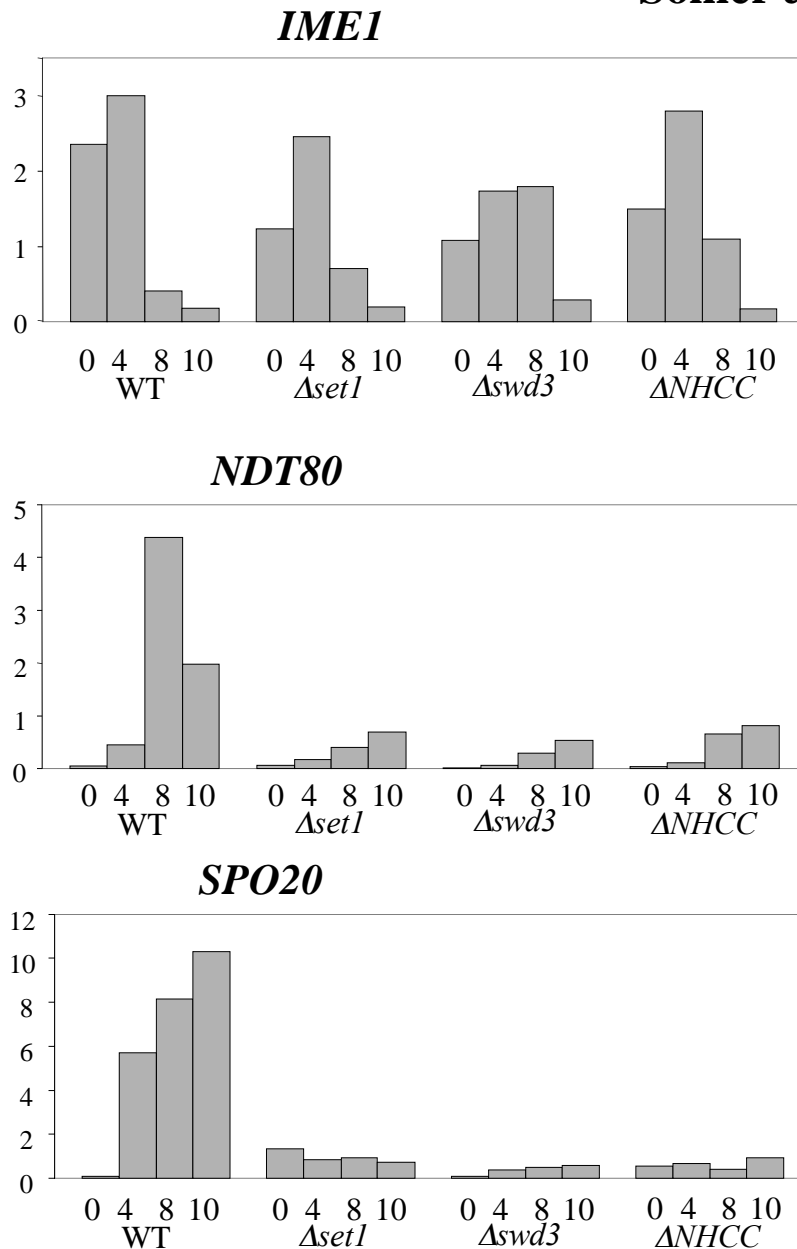

The absence of methylated H3-K4 is correlated to a defect in the induction of middle meiotic genes. Expression level of key genes (*IME1*, *NDT80* and *SPO20*) at 0, 4, 8 and 10 hours after induction of sporulation in wild-type, *set1* $\Delta$ , *swd3* $\Delta$ , and *set1* $\Delta$ *NHCC* strains. Arbitrary units.

Wild-type, *set1* $\Delta$ , *swd3* $\Delta$  and *set1* $\Delta$ *NHCC* strains (DBY745 background) were used for the meiotic time course experiment. Samples were taken as the time 0 h from the presporulation culture then at 4, 8, and 10 hours after transfer into sporulation medium. For RNA extraction, one OD unit of cells were harvested, washed with DEPC-treated H<sub>2</sub>O and immediately frozen in liquid nitrogen. mRNA were extracted with  $\mu$ MACS mRNA Isolation Kit (Miltenyi Biotec) following the manufacturer's protocol. cDNA synthesis were performed using the Advantage RT-for-PCR Kit (Clontech). Analysis of meiotic gene expression (*IME1*, *NDT80* and *SPO20*) was monitored using quantitative PCR with Roche Light Cycler. The quantity of cDNA was normalized to that of the gene *ACT1*.
